# Supplementary material for: Serotonin Transporter mRNA Expression Is Reduced in the Peripheral Blood Mononuclear Cells of Subjects with Major Depression but Normal in Fibromyalgia
Source: MDPI journal article supplement (doi:10.3390/brainsci13101485), 2023-10-20
Supplement: s1 [file s1]

## *Supplementary Material*

**Supplementary Table S1: Mean (sd) of the symptom scale pre and post by group for the placebo and drug group.** The measured symptoms were taken from Fibromyalgia Impact Questionnaire Total (FIQ-Total), the Hamilton Depression (HAM-D), and Anxiety (HAM-A).

|           |        | Placebo     |             | Quetiapine  |             |
|-----------|--------|-------------|-------------|-------------|-------------|
|           |        | Pre         | Post        | Pre         | Post        |
| FIQ-Total | FM     | 63.8 (13.5) | 61.3 (15.3) | 59.7 (12.4) | 54.5 (16.6) |
|           | FM+MDD | 75.6 (13.7) | 65.2 (16.5) | 77.2 (14.0) | 60.8 (22.0) |
| HAM-D     | FM     | 12.6 (3.8)  | 12.2 (3.6)  | 11.1 (4.6)  | 9.1 (5.5)   |
|           | MDD    | -           | -           | 26.2 (7.5)  | 13.6 (8.1)  |
|           | FM+MDD | 24.6 (1.5)  | 15.9 (4.8)  | 25.1 (2.3)  | 12.3 (5.6)  |
| HAM-A     | FM     | 11.5 (3.9)  | 10.3 (3.4)  | 10.3 (4.7)  | 8.8 (4.4)   |
|           | MDD    | -           | -           | 25.7 (7.6)  | 12.2 (8.2)  |
|           | FM+MDD | 23.5 (4.6)  | 14.7 (5.7)  | 24.0 (4.5)  | 11.9 (6.4)  |

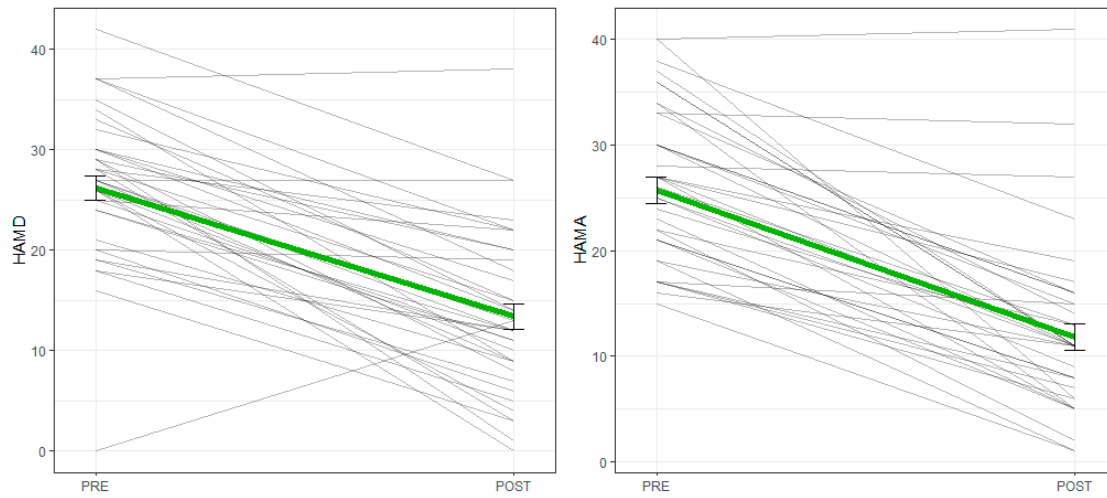

**Supplementary Figure S1: Changes in clinical symptoms from pre- to post-treatment for the MDD group.** Thin lines in the background represent individual changes and the solid thick lines represent the means from a linear mixed-effect model. Error bars represent one standard error (SE). The measured symptoms were taken from the Hamilton Depression (HAM-D) and Anxiety (HAM-A).

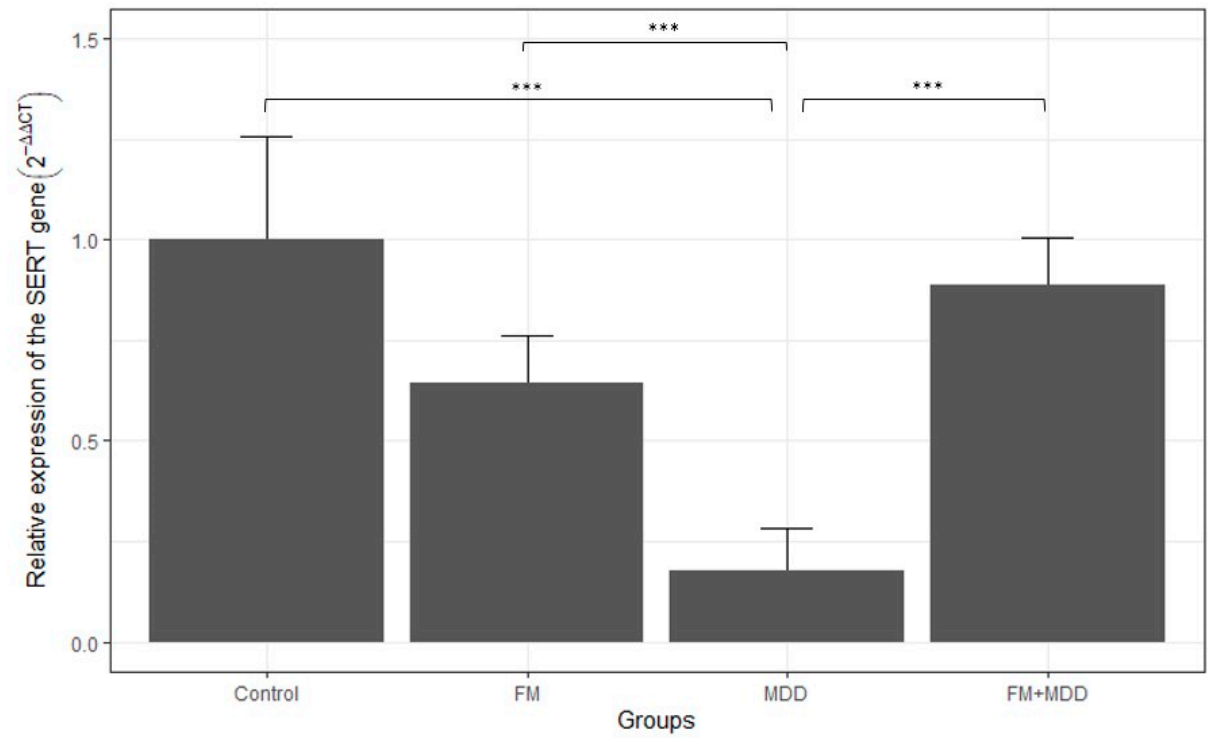

**Supplementary Figure S2:** Relative expression of the SERT mRNA by groups at baseline, using the  $2^{-\Delta\Delta CT}$  method and the control group as reference. This analysis was restricted only to female participants across groups. Error bars represent one standard error. \*\*\*  $p<0.001$ .

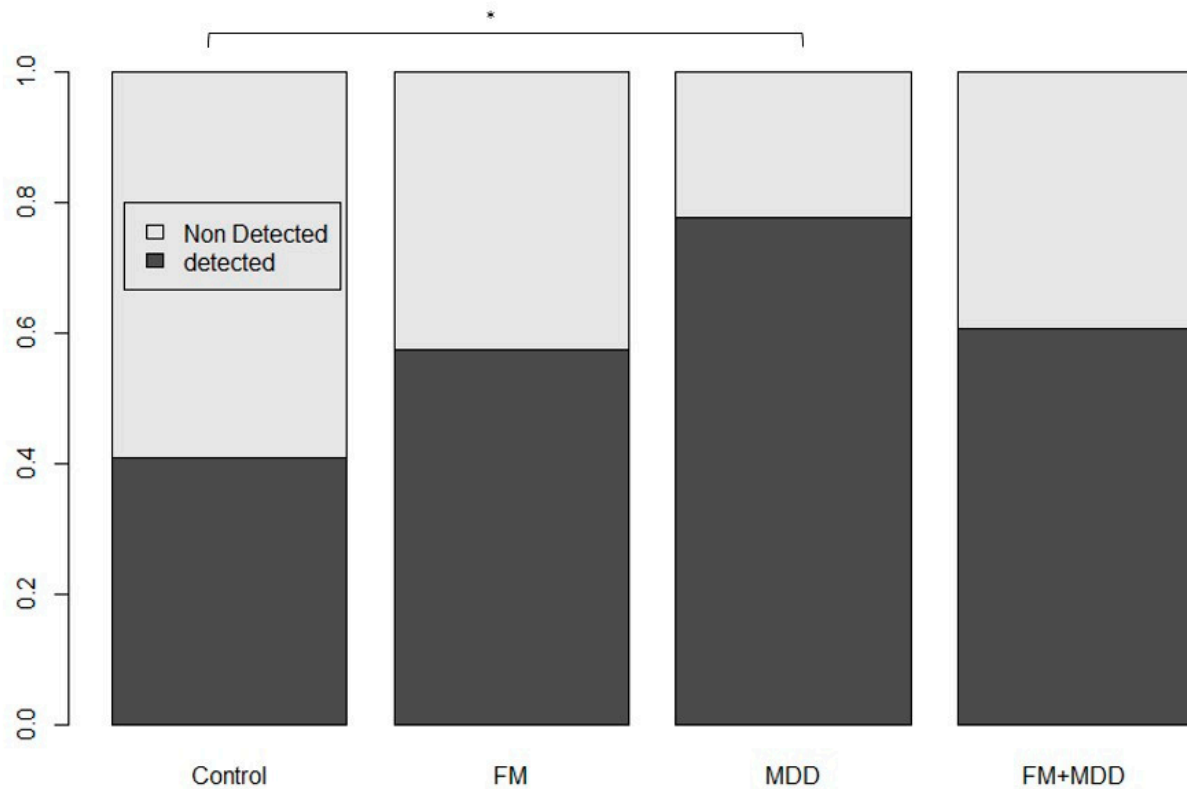

**Supplementary Figure S3:** Boxplot of the expression of the DAT mRNA by groups at baseline, using a categorical approach. This analysis restricted only to female participants across groups. The Y axis represents the level of the DAT gene detection. The more frequently the mRNA is detected, the more it is considered expressed, and vice-versa. \*  $p < 0.05$ .
